# Supplementary material for: Photocatalytic hydrogen production and storage in carbon nanotubes: a first-principles study
Source: Royal Society of Chemistry journal article supplement (doi:10.1039/d2ra02349k), 2022-01-01
Supplement: d2ra02349k1.pdf [file d2ra02349k1.pdf]

*Supporting Information for*

Photocatalytic hydrogen production and storage in carbon  
nanotubes: A first-principle study

Xiaohan Song<sup>a</sup>, Hongxia Bu<sup>b</sup>, Yingcai Fan<sup>c</sup>, Junru Wang<sup>d</sup>, Mingwen Zhao<sup>e\*</sup>

<sup>a</sup> *Shandong Institute of Advanced Technology, Jinan, Shandong, 250100, China*

<sup>b</sup> *College of Physics and Electronic Engineering, Qilu Normal University, Jinan, Shandong  
250200, China*

<sup>c</sup> *School of Information and Electronic Engineering, Shandong Technology and Business  
University, Yantai, Shandong, 264005, China*

<sup>d</sup> *Department of Physics, Yantai University, Yantai, Shandong, 264005, China*

<sup>e</sup> *School of Physics and State Key Laboratory of Crystal Materials, Shandong University, Jinan,  
Shandong, 250100, China*

Corresponding author, E-mail: [zmw@sdu.edu.cn](mailto:zmw@sdu.edu.cn)

## Text S1. The strategy of NAMD calculation

The nonadiabatic molecular dynamics (NAMD) simulations were carried out by the Hefei-NAMD code, where the real-time time-dependent KS equation framework was used to model the photo-excited carrier relaxation<sup>1</sup>. All structures were fully relaxed at 0 K, then we use the velocity rescaling to bring the temperature of the system to 100 K. After this, a 2.0 ps microcanonical ab initio molecular dynamics (MD) trajectory is then generated using a 1.0 fs time step. The NAMD results are based on an average over 100 different initial configurations obtained from the MD trajectory. For each chosen structure, we sample  $2 \times 10^4$  trajectories for the last 1 ps.

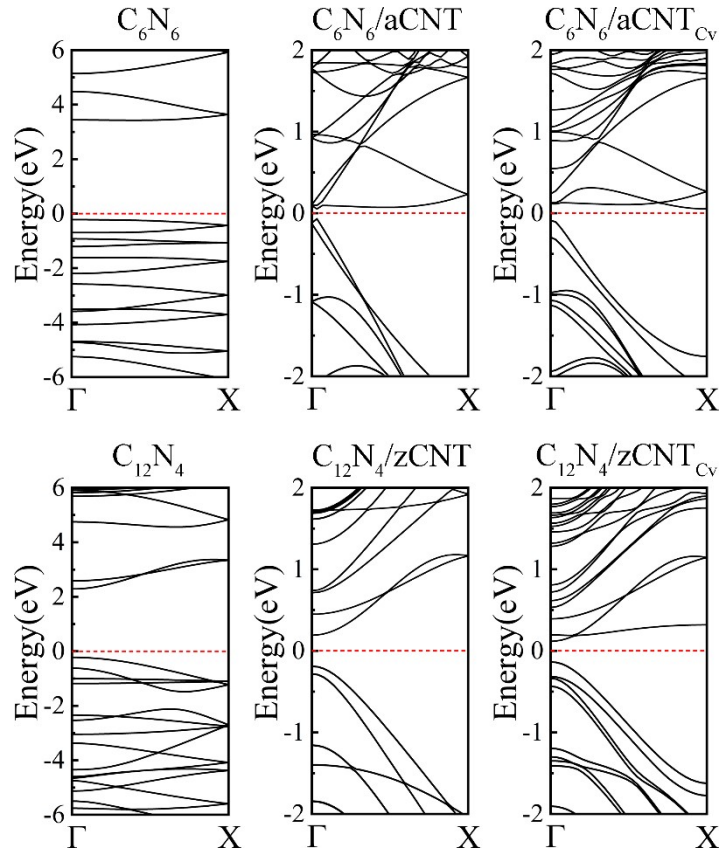

Fig. S1. Band structures of CNNWs ( $C_6N_6$  and  $C_{12}N_4$ ) and the core/shell structures ( $C_6N_6/aCNT$ ,  $C_{12}N_4/zCNT$ ,  $C_6N_6/aCNT_{Cv}$  and  $C_{12}N_4/zCNT_{Cv}$ ) calculated by using the HSE06 functional. The energy at the Fermi level was set to zero.

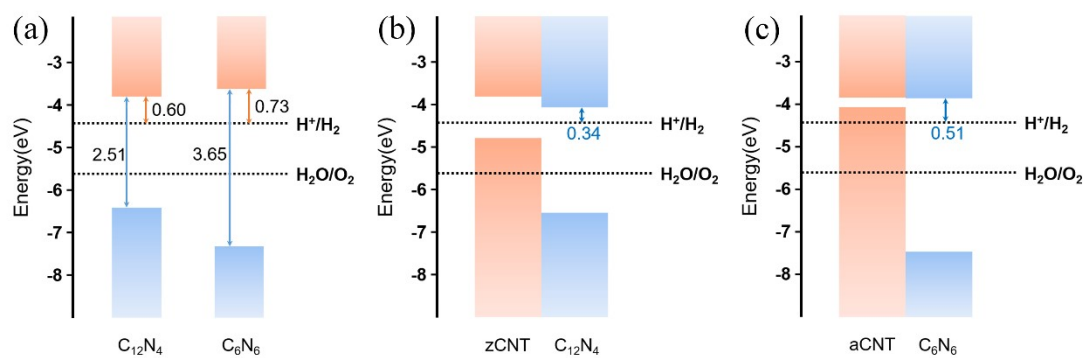

Fig. S2. Band edge alignment of (a) CNNWs ( $C_6N_6$  and  $C_{12}N_4$ ), (b)  $C_{12}N_4/zCNT$  and (c)  $C_6N_6/aCNT$  relative to the vacuum levels. The energy of the vacuum level was set to zero. The hydrogen reduction potential ( $H^+/H_2$ ) and the water oxidation potential ( $H_2O/O_2$ ) at pH 0 are -4.44 eV and -5.67 eV relative to the vacuum levels, respectively, which represented by the dotted lines.

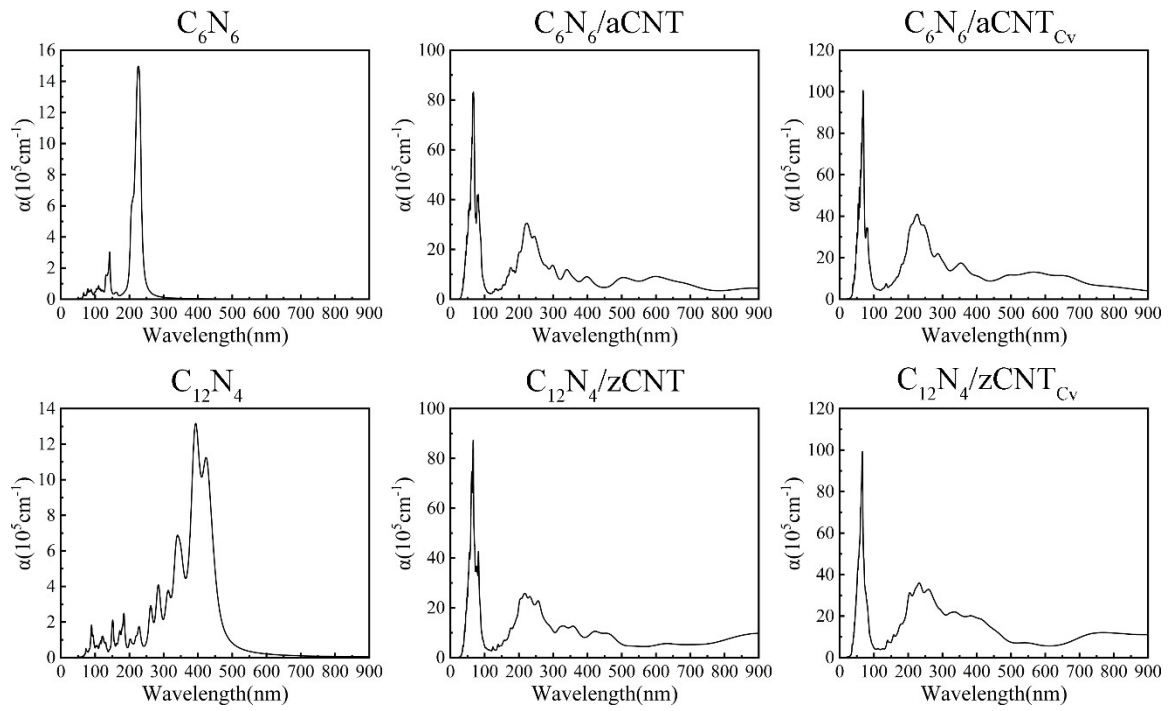

Fig. S3. Absorption coefficient of CNNWs ( $C_6N_6$  and  $C_{12}N_4$ ) and the core/shell structures ( $C_6N_6/aCNT$ ,  $C_{12}N_4/zCNT$ ,  $C_6N_6/aCNT_{Cv}$  and  $C_{12}N_4/zCNT_{Cv}$ ) calculated by using the HSE06 functional.

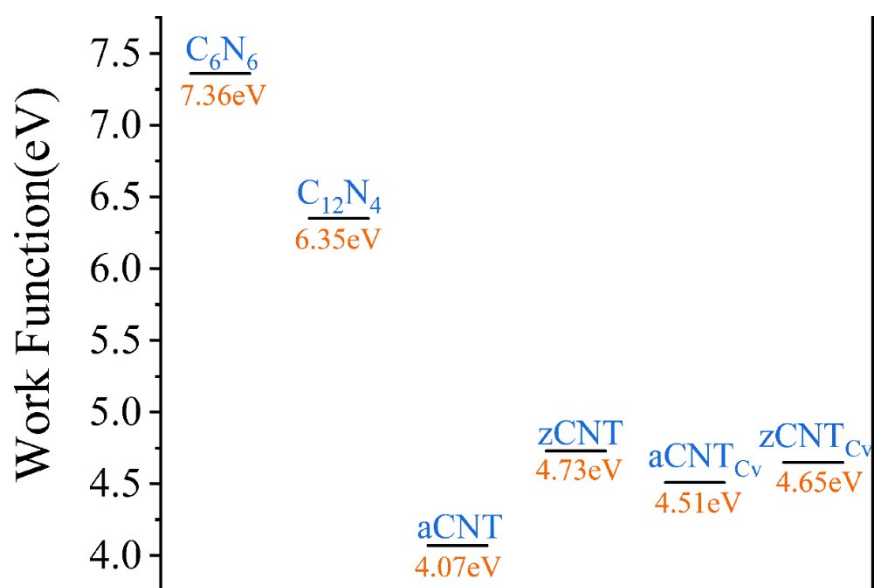

Fig. S4. The work functions of CNNWs ( $C_6N_6$  and  $C_{12}N_4$ ), CNTs (aCNT and zCNT) and CNTs with a vacancy (aCNT<sub>Cv</sub> and zCNT<sub>Cv</sub>) calculated by using the HSE06 functional.

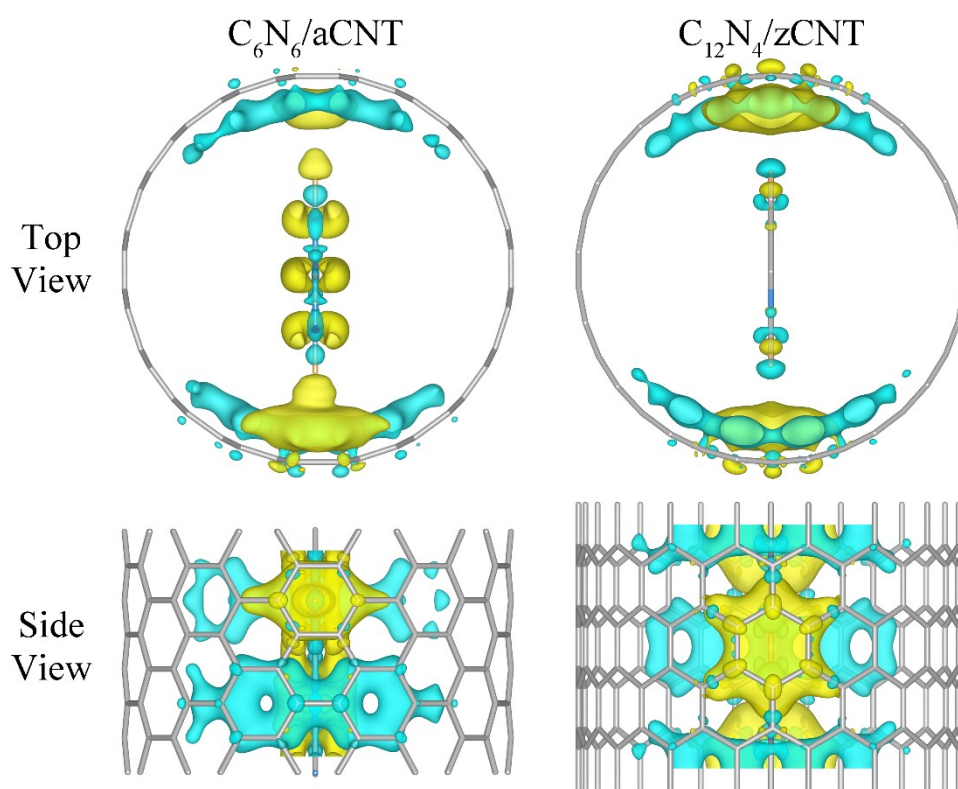

Fig. S5. Top and side views of charge density difference of the neutral core/shell structures ( $C_6N_6/aCNT$  and  $C_{12}N_4/zCNT$ ). The isosurfaces are  $4 \times 10^{-4} e/\text{\AA}^3$ . Yellow regions indicate electron accumulation, and blue regions indicate electron loss.

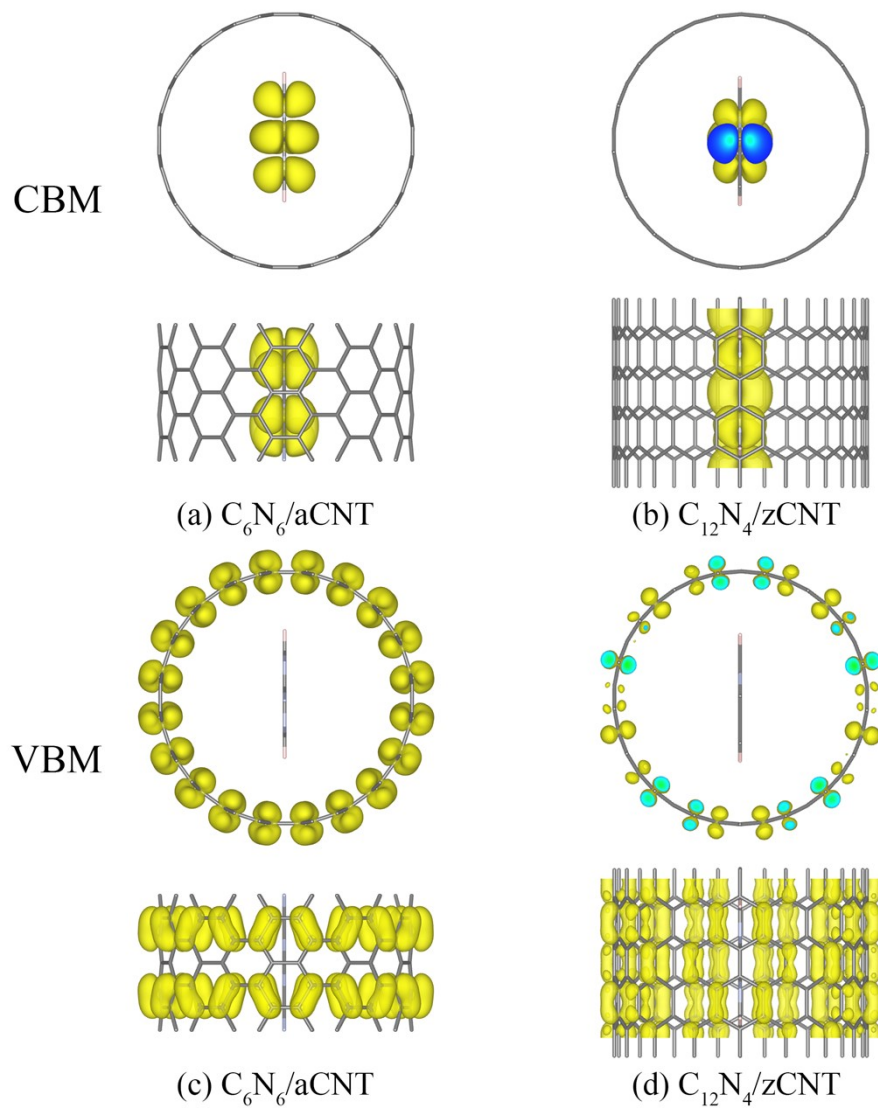

Fig. S6. Band-decomposed charge density distributions for the CBM and VBM of  $C_6N_6/aCNT$  and  $C_{12}N_4/zCNT$  structures. Yellow bubbles represent electron density with isosurface value of  $3 \times 10^{-3} e/\text{\AA}^3$  and  $1 \times 10^{-3} e/\text{\AA}^3$  respectively for  $C_6N_6/aCNT$  and  $C_{12}N_4/zCNT$  structures.



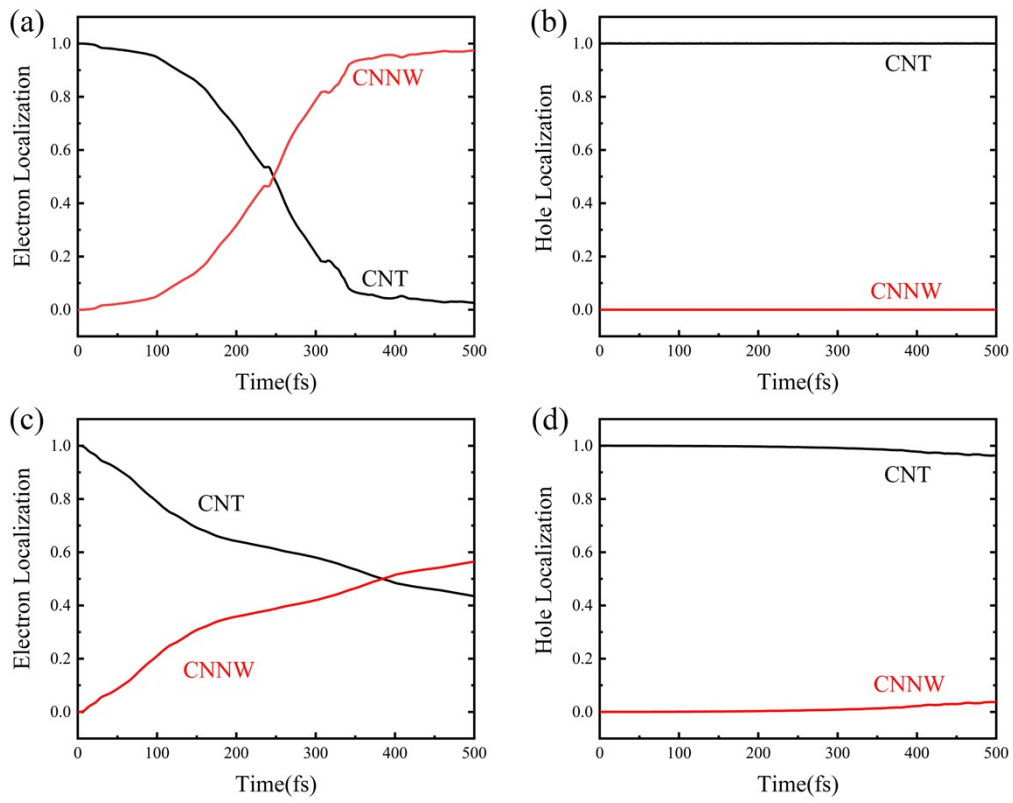

Fig. S7. The time dependent spatial charge localization of photogenerated (a) electron and (b) hole in the  $C_6N_6/aCNT$  structure at 100 K. The time dependent spatial charge localization of photogenerated (c) electron and (d) hole in the  $C_{12}N_4/zCNT$  structure at 100 K.

**Table S1.** Zero-point energy correction ( $E_{\text{ZPE}}$ ) of the adsorbates considered in this work.

| $E_{\text{ZPE}}(\text{eV})$ | $\text{C}_6\text{N}_6$ | $\text{C}_{12}\text{N}_4$ |
|-----------------------------|------------------------|---------------------------|
| $\text{H}^*$                | 0.324                  | 0.328                     |

## References

1. Q. Zheng, W. Chu, C. Zhao, L. Zhang, H. Guo, Y. Wang, X. Jiang and J. Zhao, *Wiley Interdiscip. Rev.: Comput. Mol. Sci.*, 2019, **9**, e1411.
